# Supplementary material for: A Phenotypic Profile of the Candida albicans Regulatory Network
Source: PubMed Central journal article supplement (PMC2790342; doi:10.1371/journal.pgen.1000783), 2009-12-24
Supplement: pgen.1000783.s004.pdf [file pgen.1000783.s004.pdf]

A phenotypic description of the regulatory network governing copper and iron homeostasis is provided in the primary manuscript. Here we discuss our findings in greater detail, with an emphasis on aspects relevant to the evolution of the regulatory circuit in fungi.

There are several important differences between the *C. albicans* and *S. cerevisiae* iron regulation circuitry, the most prominent being that the iron uptake circuit is positively regulated by Aft1 in *S. cerevisiae* and negatively regulated by Sfu1 in *C. albicans*. *S. cerevisiae* lacks an *SFU1* ortholog. *C. albicans* contains a possible ortholog of *S. cerevisiae* *AFT1*, *ORF19.2272*, but we found that deletion of this ORF does not result in the BPS-sensitivity characteristic of the  $\Delta\Delta aft1$  *S. cerevisiae* strain (Data Set S3, and data not shown). *S. cerevisiae* has a paralog of *AFT1*, called *AFT2*, a product of the *Saccharomyces* branch whole genome duplication event. The  $\Delta\Delta aft2$  *S. cerevisiae* strain is not BPS-sensitive and is thought to be an intra-cellular regulator of iron homeostasis[1,2]. Given that neither the *C. albicans*  $\Delta\Delta of19.2272$  nor the *S. cerevisiae*  $\Delta\Delta aft2$  knockouts showed BPS-sensitivity, it is possible that *AFT2* retains the ancestral function of the AFT gene that preceded the *AFT1/AFT2* duplication event.

Our screen also uncovered a defect in iron acquisition in a *C. albicans* TR that underwent a duplication event in the *Candida* branch of the ascomycetes. Deletion of the *C. albicans* TR *SEF1*, but not the paralog *SEF2*, resulted in BPS-sensitivity. The *SEF2* paralog may also regulate metal homeostasis: deletion of this gene resulted in copper sensitivity. Although the *SEF1/SEF2* ortholog in *S. cerevisiae* (called *SEF1*) had no previously reported role in iron homeostasis, we find that a *S. cerevisiae*  $\Delta\Delta sef1$  strain is also BPS-sensitive. Thus, the BPS-sensitivity phenotype of *C. albicans* *SEF1* may reflect the ancestral function of the *SEF* genes. The role of *SEF1* appears to be conserved between *S. cerevisiae* and *C. albicans*, and we note the intriguing possibility that the duplication event that yielded *SEF2* in the *C. albicans* lineage allowed further refinement of the circuit in a manner reminiscent of the *AFT1/AFT2* duplication in *S. cerevisiae*.

In *S. cerevisiae*, *SEF1* exhibits a genetic interaction with the CCAAT-complex genes *HAP3*, *HAP4*, and *HAP5* (Nevan Krogan, personal communication). Interestingly, we (and others[3,4]) noted BPS-sensitivity in *C. albicans* CCAAT-complex members (*HAP43*, *ORF19.1228*, *HAP5*), but not *S. cerevisiae* complex members (*HAP2*, *HAP3*, and *HAP5* were tested; Data Set S3). Thus, while the *S. cerevisiae* CCAAT-complex is indirectly linked to iron response via the  $sc\Delta sef1$  phenotype, the phenotypic consequence of CCAAT-complex deletion appears to have diverged in the two species. These differences could reflect altered regulation of respiration, a process that increases demand for iron[5], by the CCAAT-complex in the two species. Indeed, there is some evidence that the circuit is wired differently in the two species [3,4], but a definitive comparison utilizing chromatin immunoprecipitation has yet to be conducted.

## References

1. Blaiseau PL, Lesuisse E, Camadro JM (2001) Aft2p, a novel iron-regulated transcription activator that modulates, with Aft1p, intracellular iron use and resistance to oxidative stress in yeast. *J Biol Chem* 276: 34221-34226.
2. Courel M, Lallet S, Camadro JM, Blaiseau PL (2005) Direct activation of genes involved in intracellular iron use by the yeast iron-responsive transcription factor Aft2 without its paralog Aft1. *Mol Cell Biol* 25: 6760-6771.
3. Johnson DC, Cano KE, Kroger EC, McNabb DS (2005) Novel regulatory function for the CCAAT-binding factor in *Candida albicans*. *Eukaryot Cell* 4: 1662-1676.
4. Baek YU, Li M, Davis DA (2008) *Candida albicans* ferric reductases are differentially regulated in response to distinct forms of iron limitation by the Rim101 and CBF transcription factors. *Eukaryot Cell* 7: 1168-1179.
5. Philpott CC, Protchenko O (2008) Response to iron deprivation in *Saccharomyces cerevisiae*. *Eukaryot Cell* 7: 20-27.
6. Ogasawara A, Odahara K, Toume M, Watanabe T, Mikami T, et al. (2006) Change in the respiration system of *Candida albicans* in the lag and log growth phase. *Biol Pharm Bull* 29: 448-450.
7. Schuller HJ (2003) Transcriptional control of nonfermentative metabolism in the yeast *Saccharomyces cerevisiae*. *Curr Genet* 43: 139-160.
